# Supplementary material for: Transport of aerosol to the Arctic: analysis of CALIOP and French aircraft data during the spring 2008 POLARCAT campaign
Source: Copernicus journal article supplement (doi:10.5194/acp-14-8235-2014), 2014-08-18
Supplement: Supplementary file 1 [file acp-14-8235-2014-supplement.pdf]

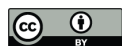

*Supplement of*

## **Transport of aerosol to the Arctic: analysis of CALIOP and French aircraft data during the spring 2008 POLARCAT campaign**

**G. Ancellet et al.**

*Correspondence to:* G. Ancellet ([gerard.ancellet@upmc.fr](mailto:gerard.ancellet@upmc.fr))

Wind 700hPa EGMWFMar.30,2008 12:00:00

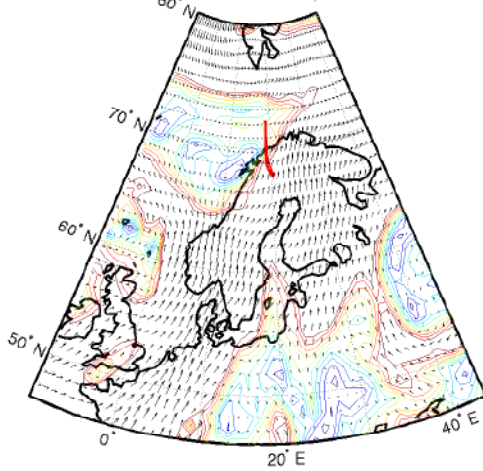

Wind 700hPa EGMWFMar.31,2008 12:00:00

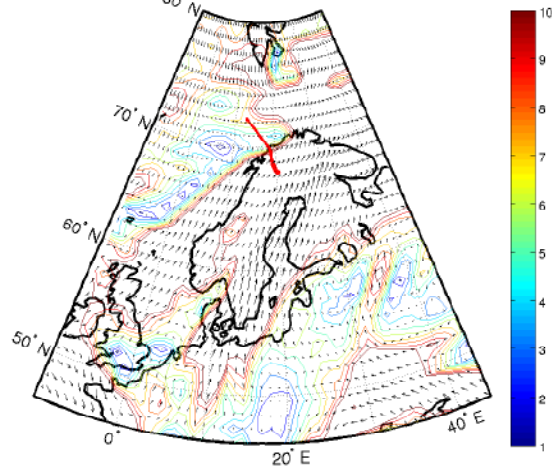

Wind 700hPa EGMWFApr.01,2008 12:00:00

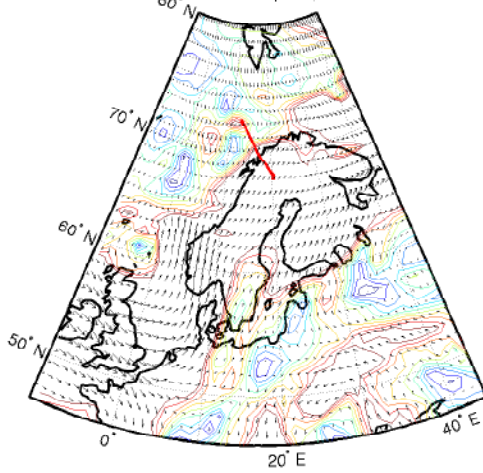

Wind 700hPa EGMWFApr.03,2008 12:00:00

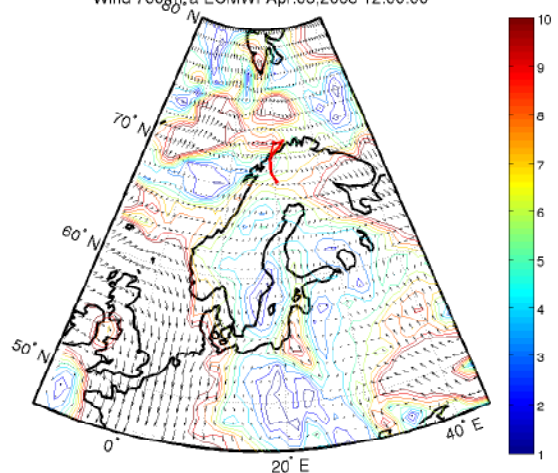

Wind 700hPa EGMWFApr.06,2008 12:00:00

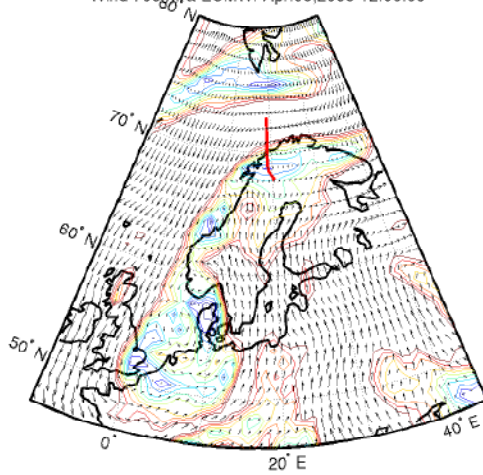

Wind 700hPa EGMWFApr.07,2008 12:00:00

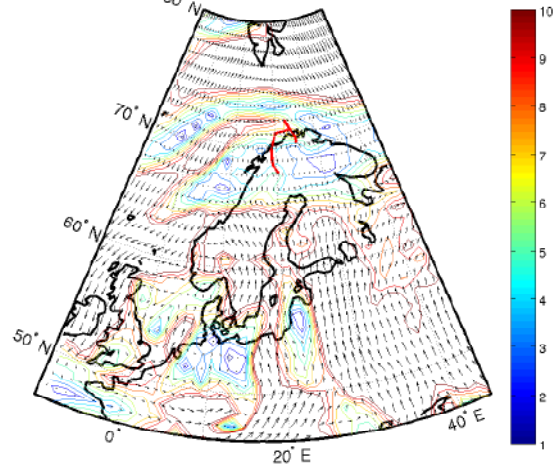

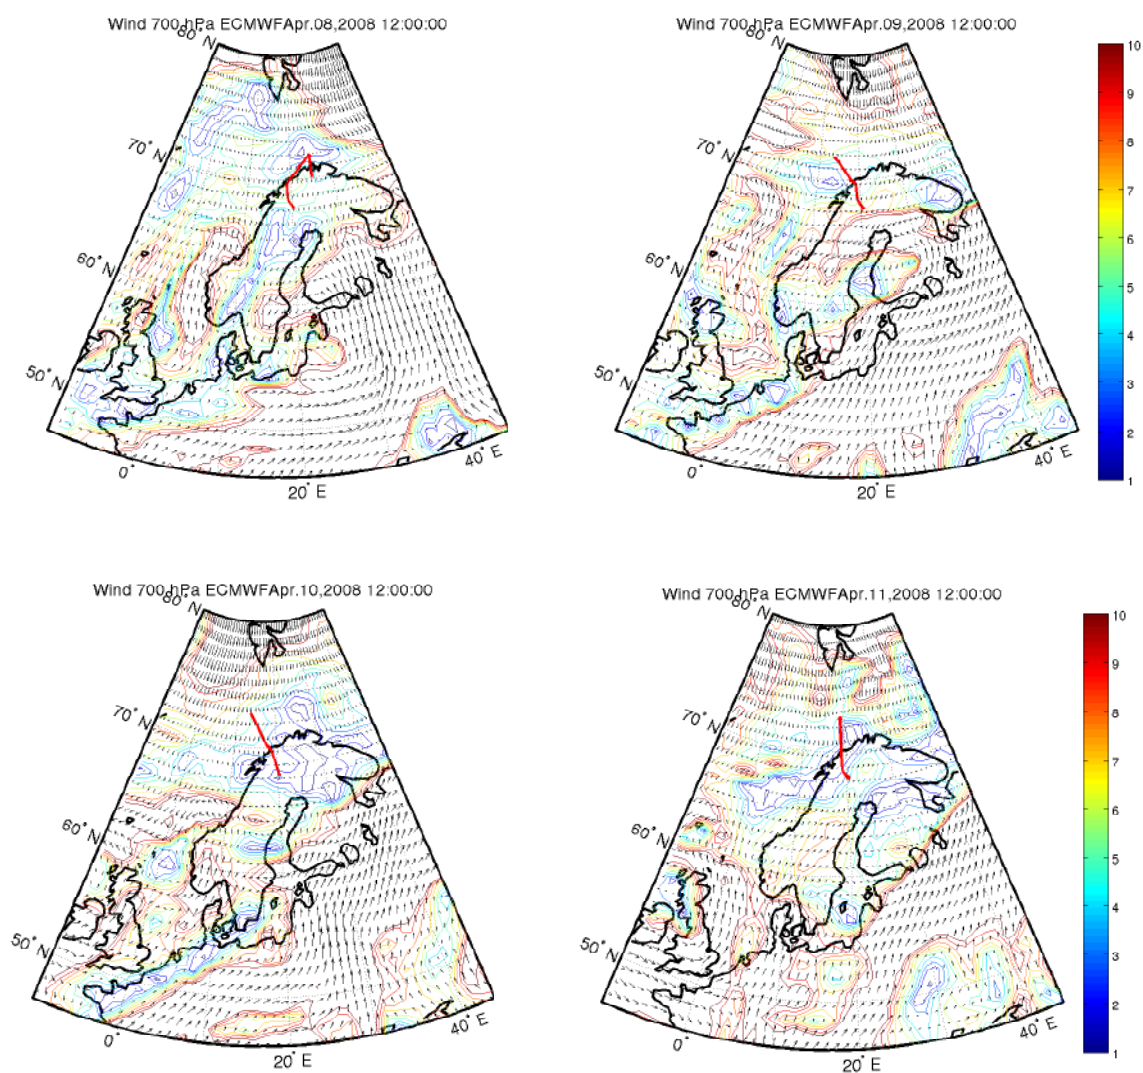

Figure 1 Wind field at 700 hPa,12:00UT from March 30 to April 11 for the aircraft flights listed in Table 1. The color scale corresponds to the wind intensity in  $\text{m.s}^{-1}$

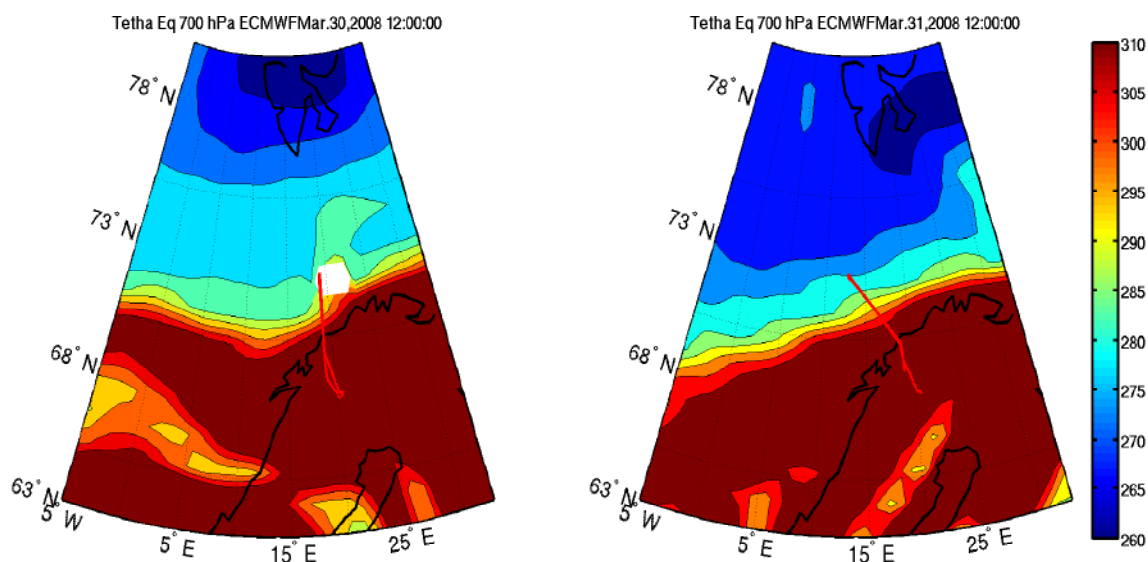

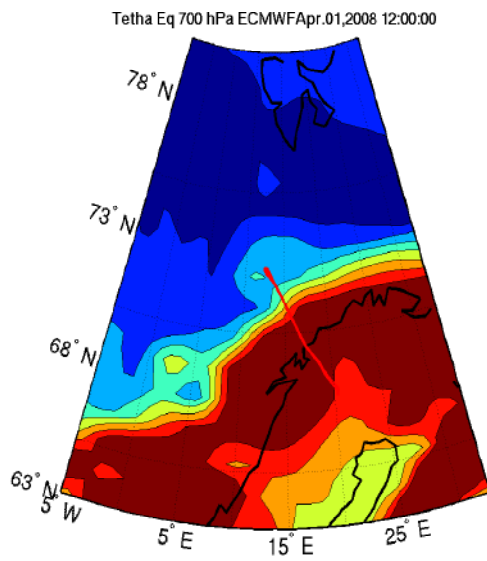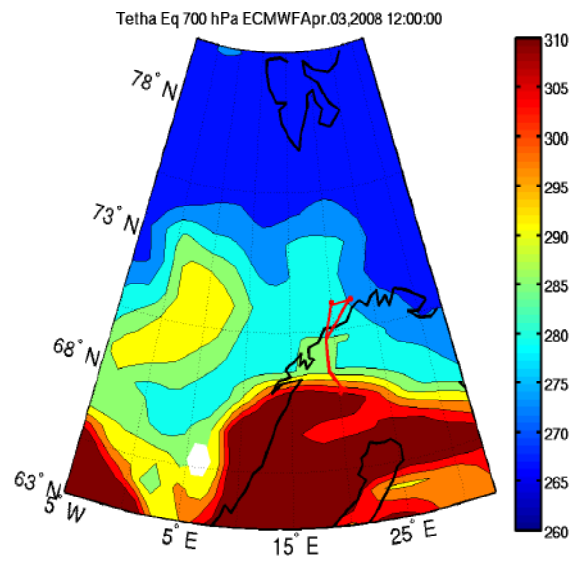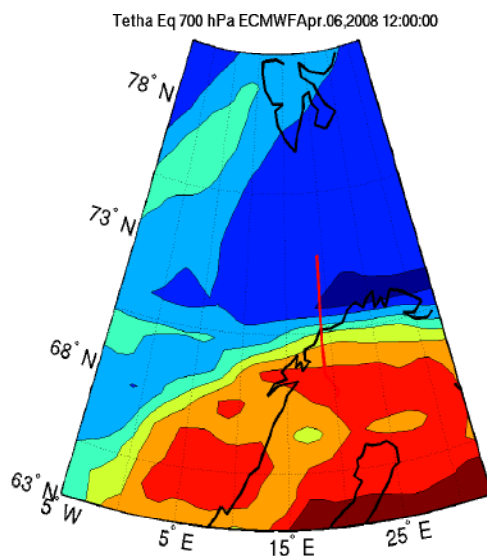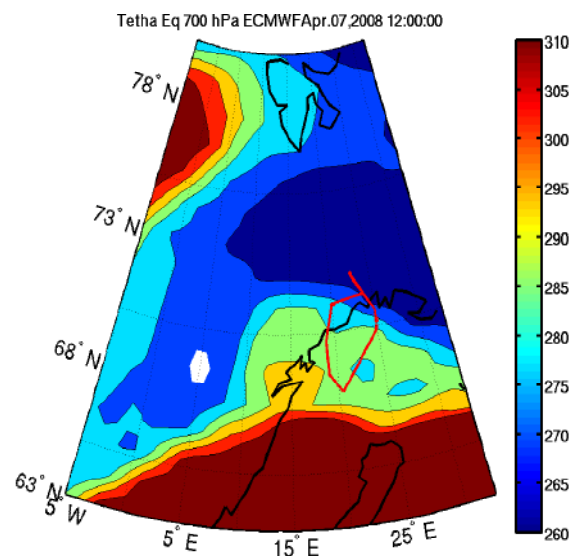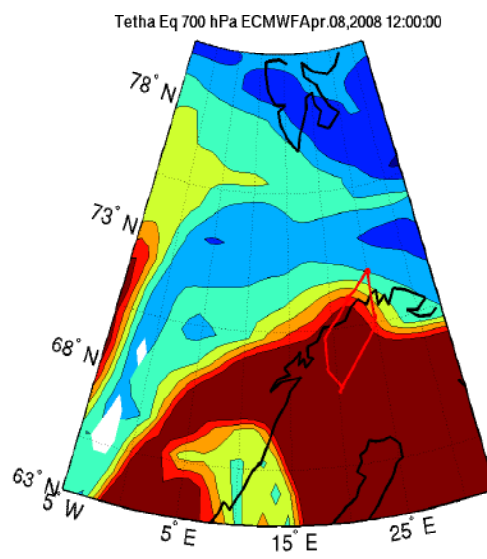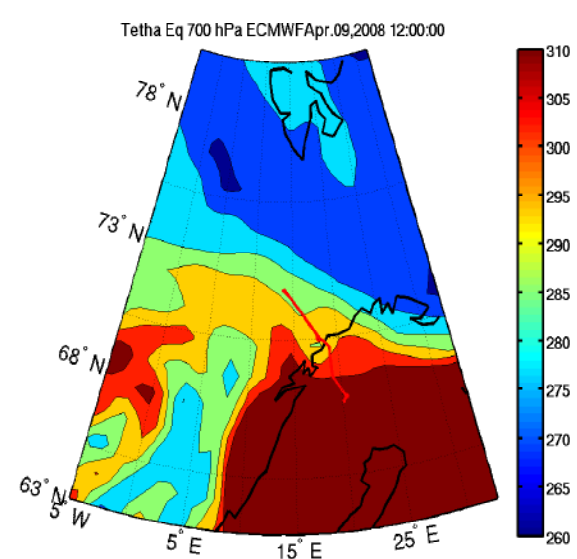

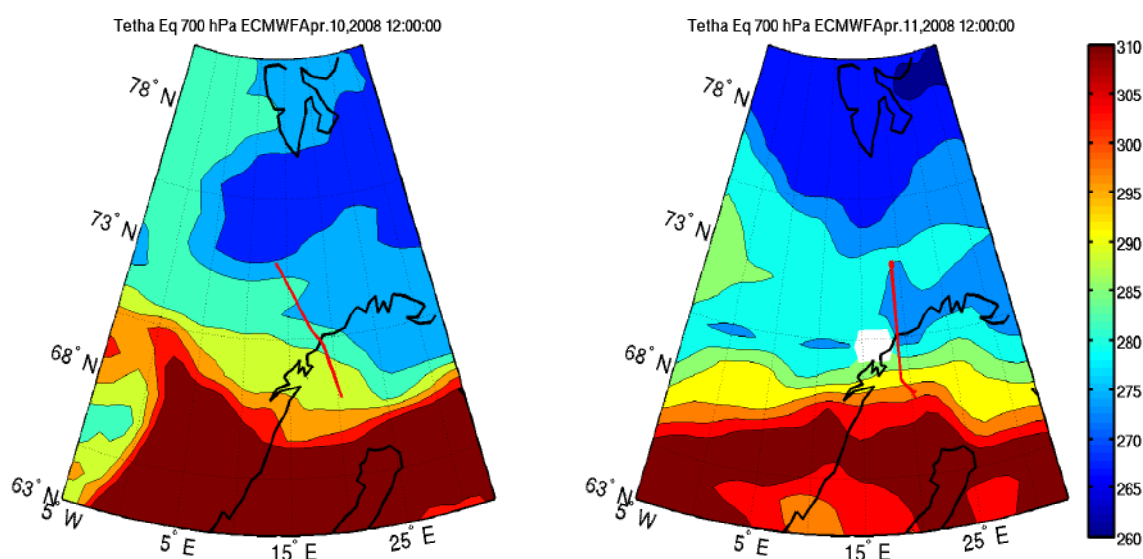

Figure 2: Equivalent potential temperature in K at 700 hPa, 12:00 UT from March 10 to April 11 for the aircraft flights listed in Table 1

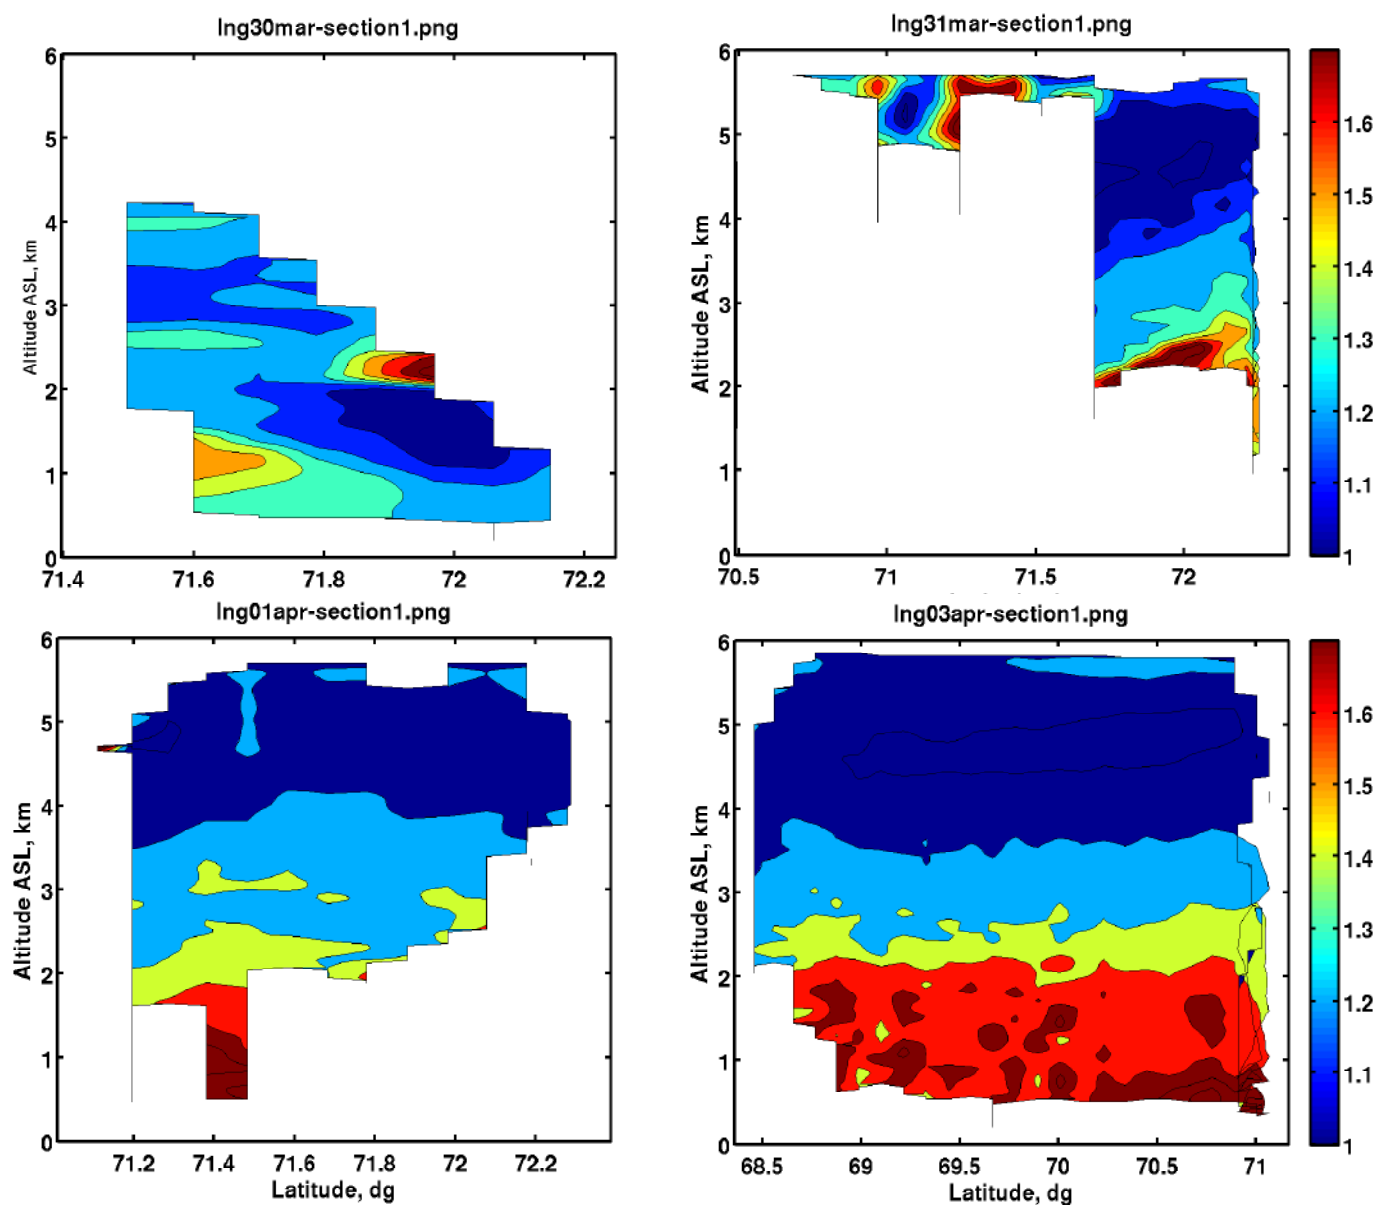



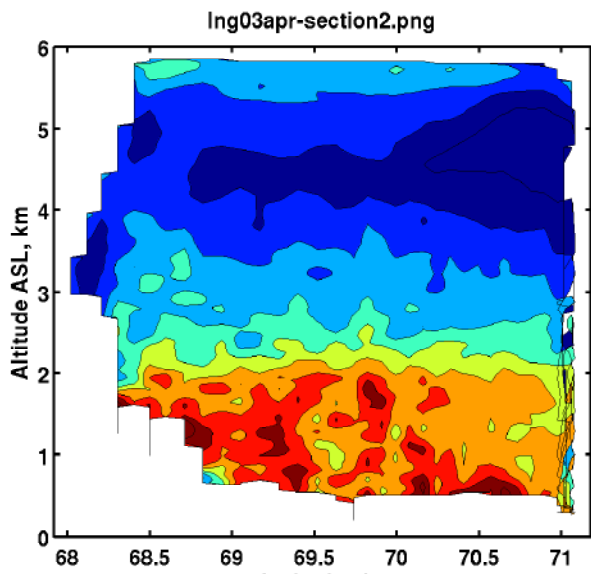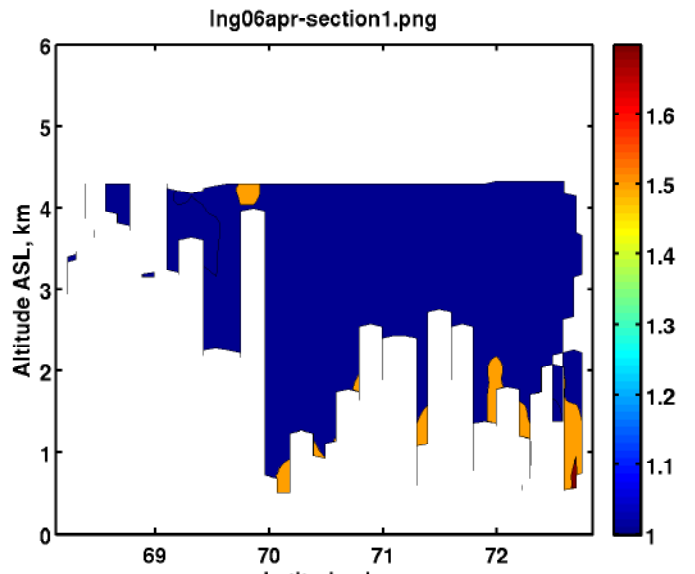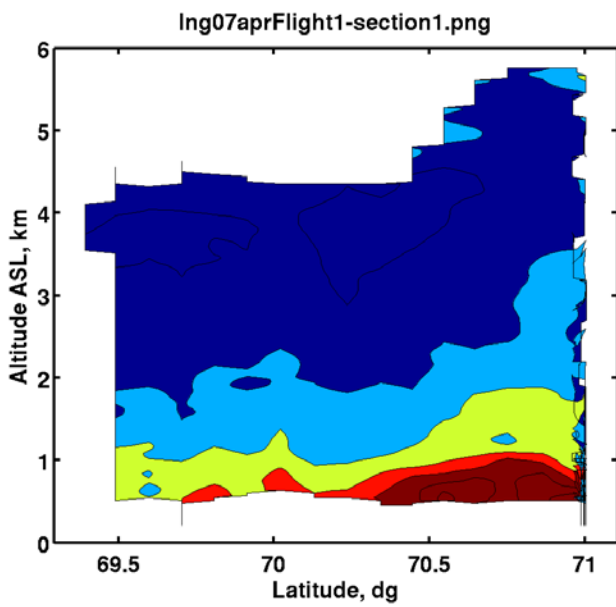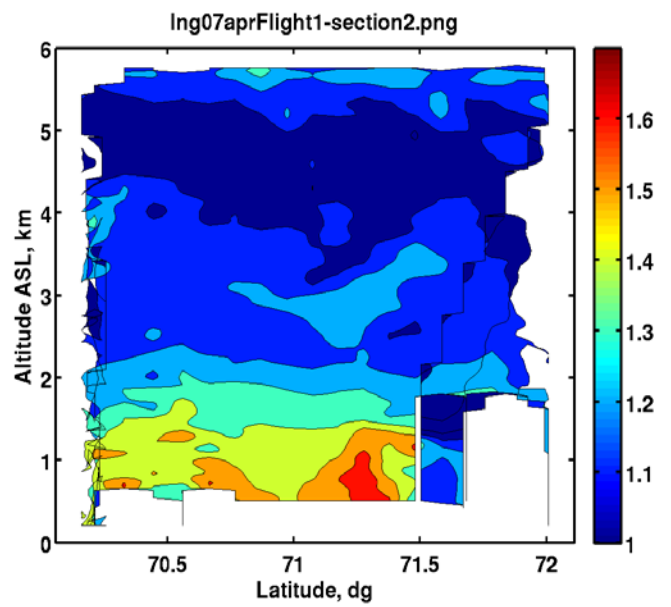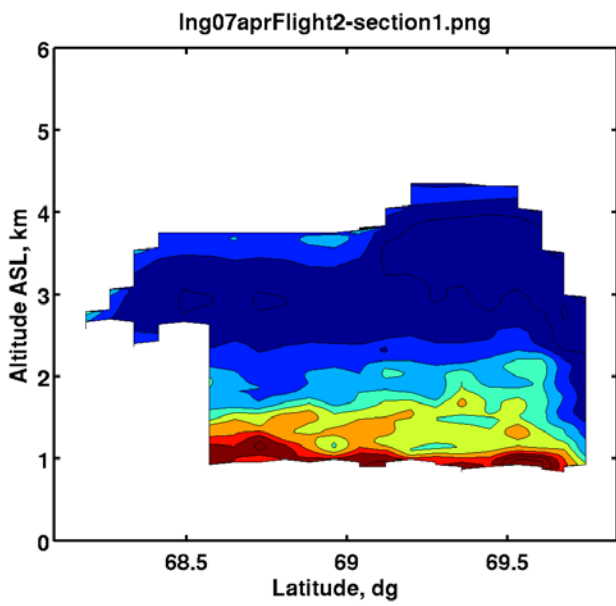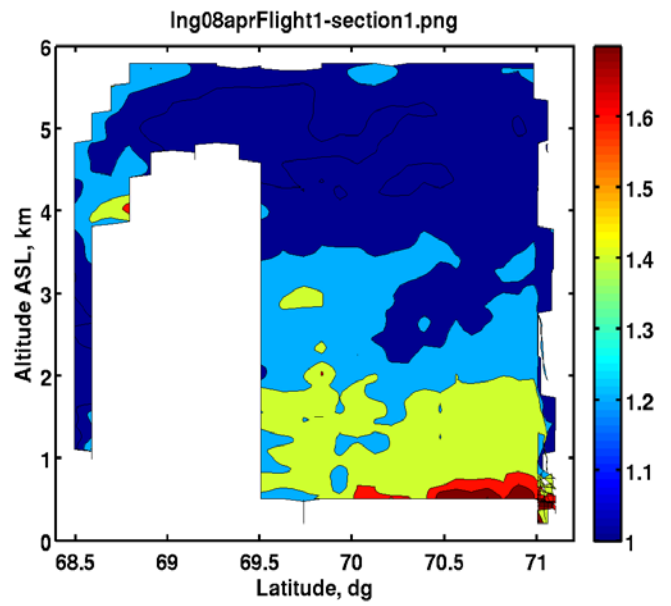

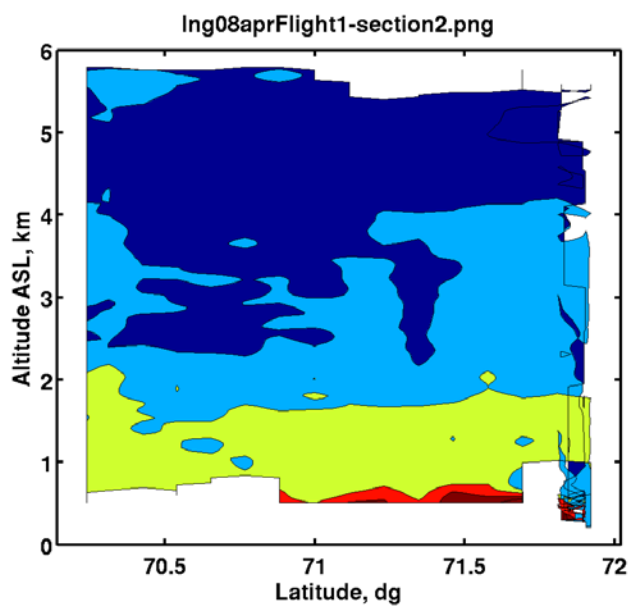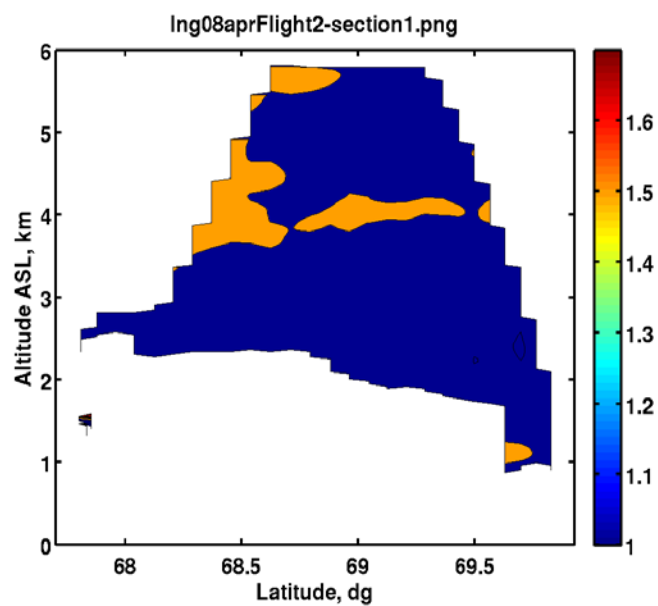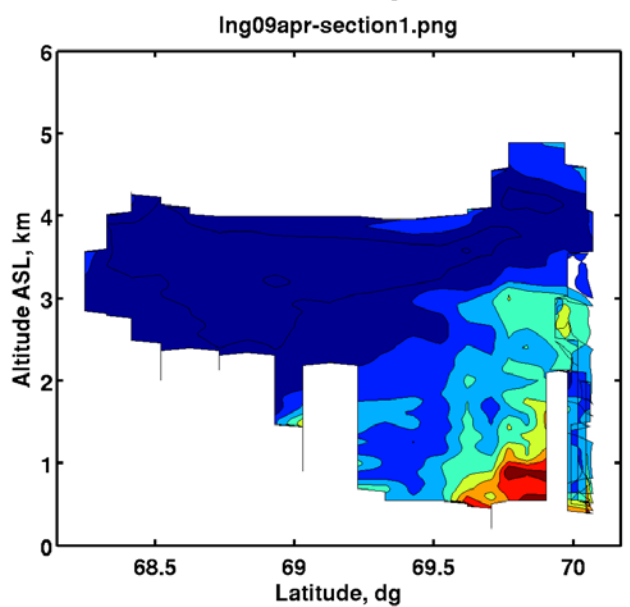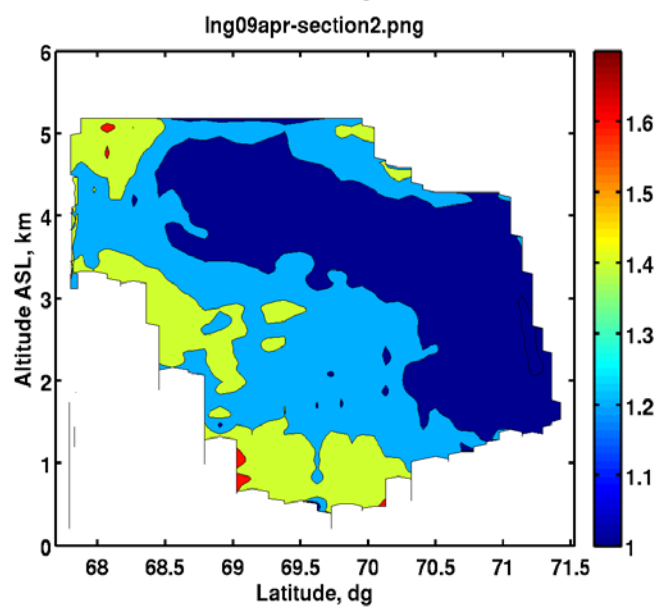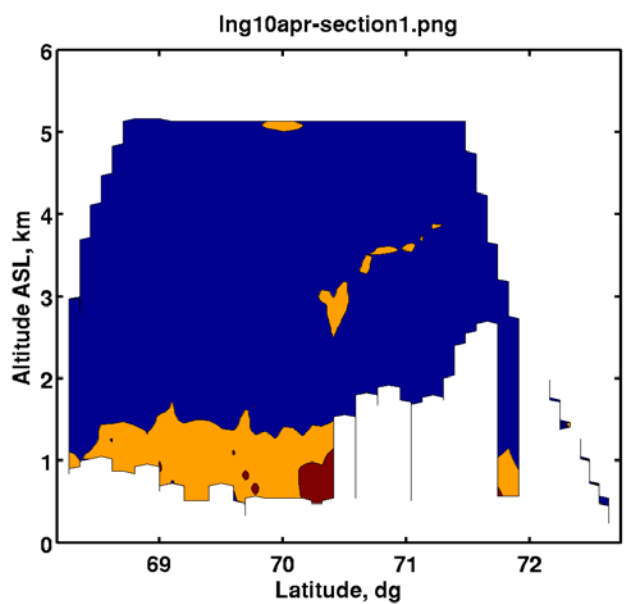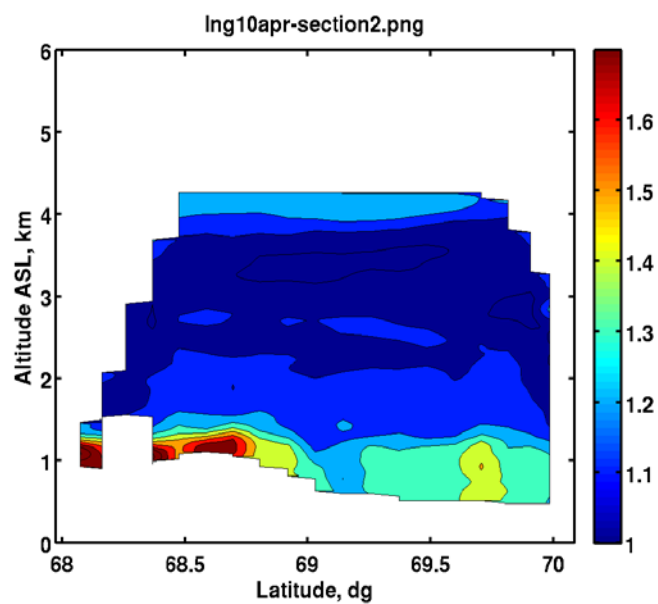

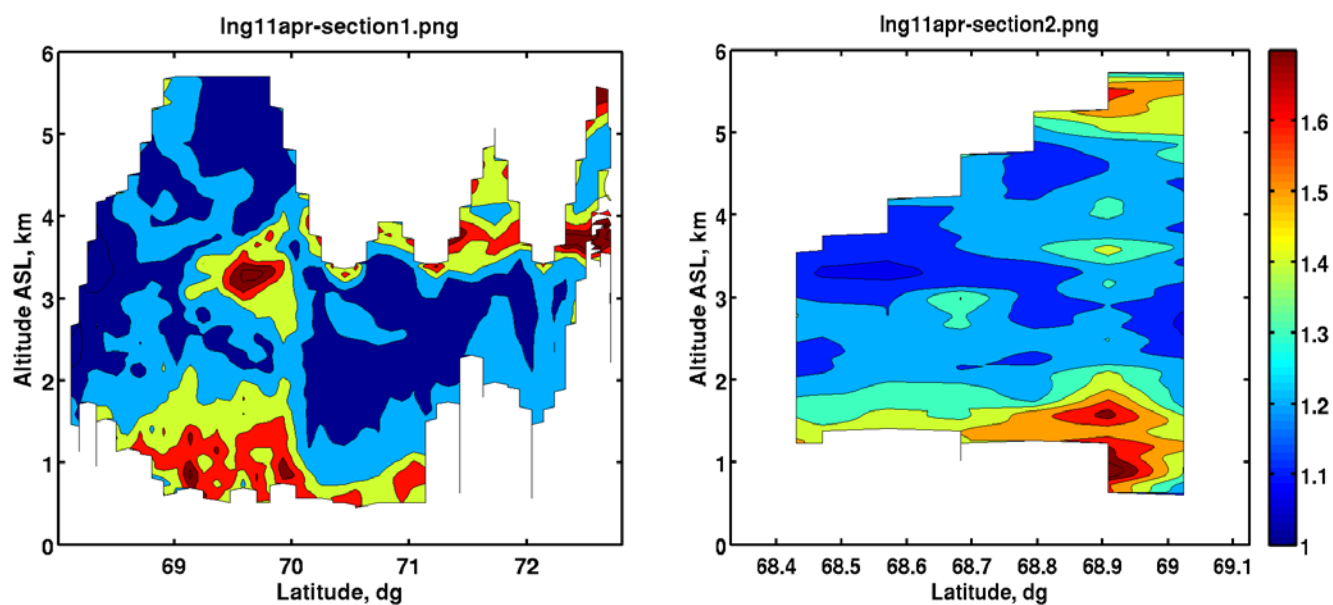

Fig. 3 Vertical cross sections of the airborne lidar 532 nm backscatter ratio for the aircraft meridional cross section from 30 March to 7 April listed in Table 1.
